# Supplementary material for: The impact of a thin endometrial lining on fresh and frozen–thaw IVF outcomes: an analysis of over 40 000 embryo transfers
Source: PubMed Central journal article supplement — Hum Reprod. 2018 Sep 17;33(10):1883–8. doi: 10.1093/humrep/dey281 (PMC6145412; doi:10.1093/humrep/dey281), 2018-09-17
Supplement: dey281_supplemental_table_si.pdf [file dey281_supplemental_table_si.pdf]

**Supplemental Table S1 Clinical and live birth rates in autologous and donor fresh IVF-ET by age.**

| Peak endometrial thickness    | Proportion % (n) |                      |                | Clinical pregnancy rate (n) |                  |                  | Pregnancy loss rate (n) |                  |                  | Live birth rate (n) |                |               |
|-------------------------------|------------------|----------------------|----------------|-----------------------------|------------------|------------------|-------------------------|------------------|------------------|---------------------|----------------|---------------|
|                               | <35              | 35–40                | >40            | <35                         | 35–40            | >40              | <35                     | 35–40            | >40              | <35                 | 35–40          | >40           |
| ≥8 mm                         | 89.7<br>(8309)   | 87.8<br>(7201)       | 83.9<br>(3710) | 51.7<br>(4296)              | 42.7<br>(3077)   | 25.2<br>(936)    | 16.7<br>(718)           | 23.6<br>(725)    | 41.5<br>(388)    | 43.1<br>(3578)      | 32.7<br>(2352) | 14.8<br>(548) |
| 7.0–7.9 mm                    | 7.6<br>(707)     | 8.1<br>(667)         | 10.5<br>(463)  | 46.0<br>(325)               | 33.4<br>(223)    | 19.0<br>(88)     | 17.8<br>(58)            | 29.1<br>(65)     | 51.1<br>(45)     | 37.8<br>(267)       | 23.7<br>(158)  | 9.3<br>(43)   |
| 6.0–6.9 mm                    | 2.1<br>(198)     | 3.2<br>(266)         | 4.1<br>(183)   | 46.0<br>(91)                | 34.2<br>(91)     | 19.7<br>(36)     | 23.1<br>(21)            | 26.4<br>(24)     | 38.9<br>(14)     | 35.4<br>(70)        | 25.2<br>(67)   | 12<br>(22)    |
| 5.0–5.9 mm                    | 0.5<br>(49)      | 0.7<br>(56)          | 1.1<br>(50)    | 34.7<br>(17)                | 28.6<br>(16)     | 14.0<br>(7)      | 17.6<br>(3)             | 37.5<br>(6)      | N/A              | 28.6<br>(14)        | 17.9<br>(10)   | N/A           |
| 4.0–4.9 mm                    | N/A <sup>a</sup> | 0.1<br>(9)           | 0.3<br>(15)    | N/A <sup>a</sup>            | N/A <sup>a</sup> | N/A <sup>a</sup> | N/A <sup>a</sup>        | N/A <sup>a</sup> | N/A <sup>a</sup> | N/A <sup>a</sup>    | 0              | 0             |
| Total                         | 9263             | 8199                 | 4421           |                             |                  |                  |                         |                  |                  |                     |                |               |
| P for difference <sup>b</sup> |                  | <0.0001 <sup>d</sup> |                | 0.001                       | <0.0001          | 0.003            | 0.16                    | 0.14             | 0.2              | 0.001               | <0.0001        | 0.004         |
| P for trend <sup>c</sup>      |                  |                      |                | 0.0001                      | <0.0001          | 0.0005           | 0.16                    | 0.04             | 0.43             | <0.0001             | <0.0001        | 0.008         |

<sup>a</sup>Data for cell counts <6 were suppressed and not available (N/A).

<sup>b</sup>P values in Chi-square tests for differences in all groups with available data.

<sup>c</sup>P values in Cochran–Armitage tests for trends in rates across endometrial thickness strata in all groups with available data.

<sup>d</sup>P values in Chi-square tests for differences comparing age groups.
