# Supplementary material for: The impact of a thin endometrial lining on fresh and frozen–thaw IVF outcomes: an analysis of over 40 000 embryo transfers
Source: PubMed Central journal article supplement — Hum Reprod. 2018 Sep 17;33(10):1883–8. doi: 10.1093/humrep/dey281 (PMC6145412; doi:10.1093/humrep/dey281), 2018-09-17
Supplement: dey281_supplemental_table_sii.pdf [file dey281_supplemental_table_sii.pdf]

**Supplemental Table SII Clinical and live birth rates in autologous and donor frozen–thaw ET by age.**

| Peak endometrial thickness    | Proportion % (n)  |                |                  | Clinical pregnancy rate (n) |                  |                  | Pregnancy loss rate (n) |                  |                  | Live birth rate (n) |                  |                  |
|-------------------------------|-------------------|----------------|------------------|-----------------------------|------------------|------------------|-------------------------|------------------|------------------|---------------------|------------------|------------------|
|                               | <35               | 35–40          | >40              | <35                         | 35–40            | >40              | <35                     | 35–40            | >40              | <35                 | 35–40            | >40              |
| ≥8 mm                         | 85.6<br>(9204)    | 86.0<br>(5343) | 85.3<br>(1716)   | 41.7<br>(3835)              | 36.4<br>(1947)   | 27.0<br>(463)    | 23.1<br>(886)           | 28.6<br>(556)    | 38.7<br>(179)    | 32.0<br>(2949)      | 26.0<br>(1391)   | 16.6<br>(284)    |
| 7.0–7.9 mm                    | 11.4<br>(1226)    | 11.0<br>(681)  | 11.1<br>(223)    | 41.8<br>(512)               | 37.2<br>(253)    | 22.9<br>(51)     | 25.4<br>(130)           | 30.0<br>(76)     | 51.0<br>(26)     | 31.2<br>(382)       | 26.0<br>(177)    | 11.2<br>(25)     |
| 6.0–6.9 mm                    | 2.1<br>(231)      | 2.0<br>(125)   | 2.8<br>(57)      | 35.9<br>(83)                | 28.8<br>(36)     | 21.1<br>(12)     | 24.1<br>(20)            | 25.0<br>(9)      | 33.3<br>(4)      | 27.3<br>(63)        | 21.6<br>(27)     | 14.0<br>(8)      |
| 5.0–5.9 mm                    | 0.4<br>(44)       | 0.5<br>(30)    | 0.3<br>(6)       | 27.3<br>(12)                | 30.0<br>(9)      | N/A <sup>a</sup> | 33.3<br>(4)             | N/A <sup>a</sup> | N/A <sup>a</sup> | 18.2<br>(8)         | N/A <sup>a</sup> | N/A <sup>a</sup> |
| 4.0–4.9 mm                    | 0.1<br>(16)       | 0.2<br>(13)    | N/A <sup>a</sup> | N/A <sup>a</sup>            | N/A <sup>a</sup> | N/A <sup>a</sup> | N/A <sup>a</sup>        | N/A <sup>a</sup> | N/A <sup>a</sup> | N/A <sup>a</sup>    | N/A <sup>a</sup> | N/A <sup>a</sup> |
| Total                         | 10758             | 6216           | 2011             |                             |                  |                  |                         |                  |                  |                     |                  |                  |
| P for difference <sup>b</sup> | 0.03 <sup>c</sup> |                |                  | 0.08                        | 0.28             | 0.28             | 0.57                    | 0.78             | 0.21             | 0.09                | 0.53             | 0.11             |

<sup>a</sup>Data for cell counts <6 were suppressed and not available (N/A).

<sup>b</sup>P values in Chi-square tests for differences in all groups with available data.

<sup>c</sup>P values in Chi-square tests for differences comparing age groups.
